# Supplementary material for: Membrane-Bound Redox Enzyme Cytochrome bd-I Promotes Carbon Monoxide-Resistant Escherichia coli Growth and Respiration
Source: MDPI journal article supplement (doi:10.3390/ijms25021277), 2024-01-20
Supplement: s1 [file s1]

## Supplementary Figures

### Membrane-bound redox enzyme cytochrome *bd*-I promotes carbon monoxide-resistant *Escherichia coli* growth and respiration

Martina R. Nastasi<sup>1</sup>, Vitaliy B. Borisov<sup>2,\*</sup>, Elena Forte<sup>1,\*</sup>

<sup>1</sup> Department of Biochemical Sciences, Sapienza University of Rome, 00185 Rome, Italy; [martinaroberta.nastasi@uniroma1.it](mailto:martinaroberta.nastasi@uniroma1.it); [Elena.Forte@uniroma1.it](mailto:Elena.Forte@uniroma1.it)

<sup>2</sup> Belozersky Institute of Physico-Chemical Biology, Lomonosov Moscow State University, 119991 Moscow, Russia; [bor@belozersky.msu.ru](mailto:bor@belozersky.msu.ru)

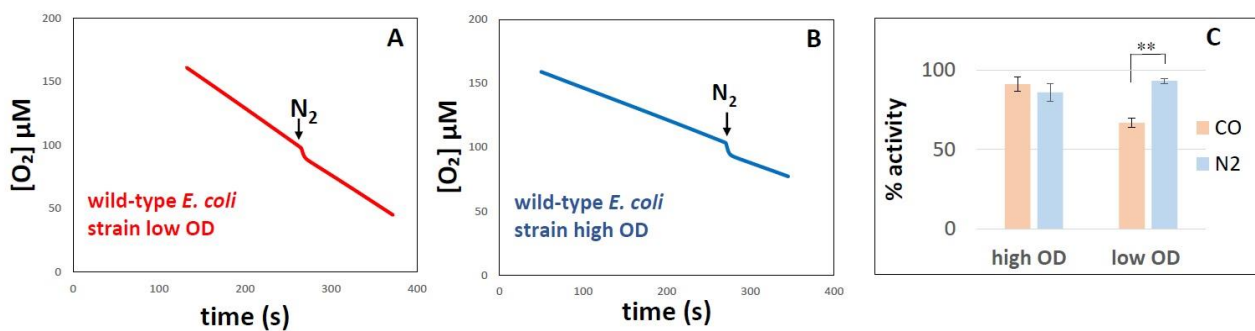

#### Supplementary Figure S1

**Effect of N<sub>2</sub> on wild-type cell respiration.** Traces of O<sub>2</sub> consumption of cell suspensions showing no effect of N<sub>2</sub> on aerobic respiration of the *E. coli* wild-type strain MG1655 measured with cells grown at low (**A**, red line) and at high (**B**, blue line) OD values. Low and high OD values indicate the prevalent expression of cytochrome *bo*<sub>3</sub> and the *bd* oxidases, respectively. 96 μM N<sub>2</sub> was added at [O<sub>2</sub>] = 100 μM. Additions: 1.5 ml of cells at 0.4 OD (red line), 0.25 ml of cells at 5 OD (blue line). (**C**): Percent activity after CO or N<sub>2</sub> addition to respiring wild-type cells. Values represent the mean ( $n = 3$ ) ± standard deviations. Asterisks denote statistically significant differences between the effects of CO and N<sub>2</sub> in wild-type cells grown at low OD (\*\*,  $p < 0,01$ ;  $t$ -test).

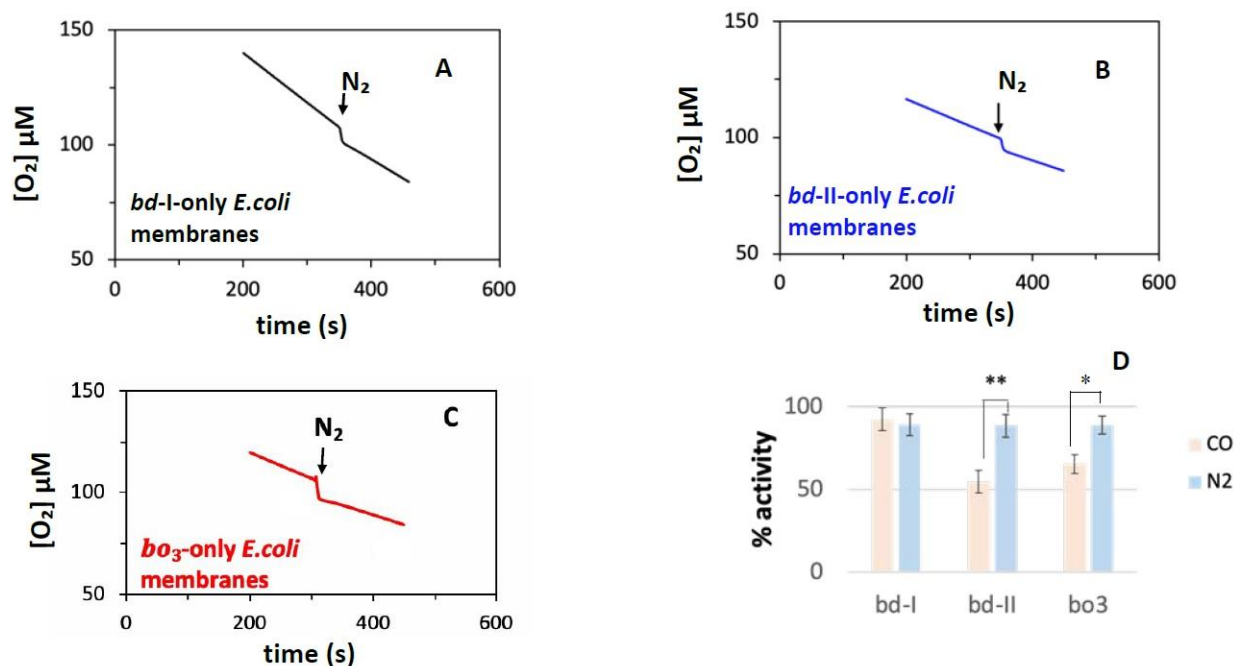

### Supplementary Figure S2

**Effect of  $N_2$  on mutant strain respiration.** Traces of  $O_2$  consumption showing the effect of  $N_2$  on aerobic respiration of isolated membranes from *E. coli* mutant strains expressing cytochrome *bd-I* (A), or cytochrome *bd-II* (B), or cytochrome *bo3* (C) as the sole terminal oxidase. 96  $\mu M$   $N_2$  was added at  $[O_2] = 100 \mu M$  and had no effect on the respiratory activity of the membranes. Additions: 0.7 mg/ml of *bd-I*-containing isolated membranes (black line), 0.6 mg/ml of *bd-II*-containing isolated membranes (blue line), 0.7 mg/ml of *bo3*-containing isolated membranes (red line). (D): Percent activity after CO or  $N_2$  addition to respiring membranes. Values represent the mean ( $n = 3$ )  $\pm$  standard deviations. Asterisks denote statistically significant differences between the effects of CO and  $N_2$  in *bd-II* and *bo3* respiring isolated membranes (\*,  $p < 0,05$ ; \*\*,  $p < 0,01$ ; *t*-test).
